# Supplementary figures and images for: Time encoding migrates from prefrontal cortex to dorsal striatum during learning of a self-timed response duration task
Source: eLife journal article supplement (doi:10.7554/elife.65495), 2022-09-02

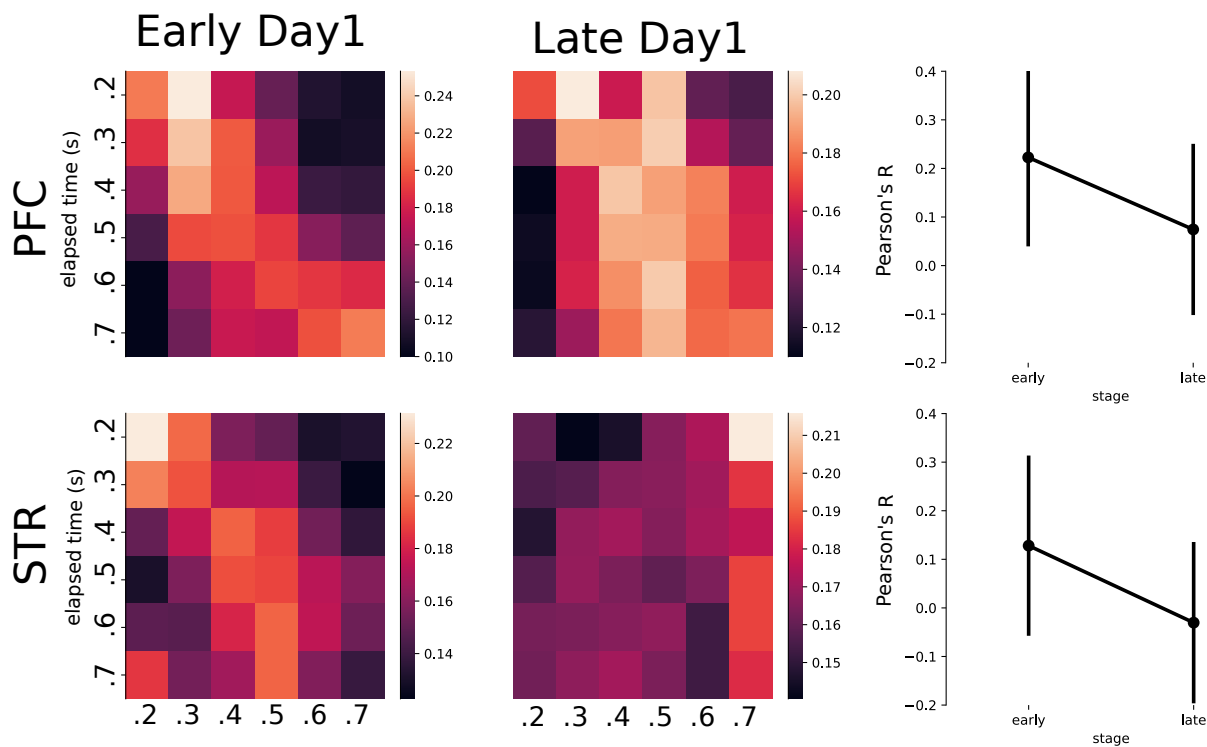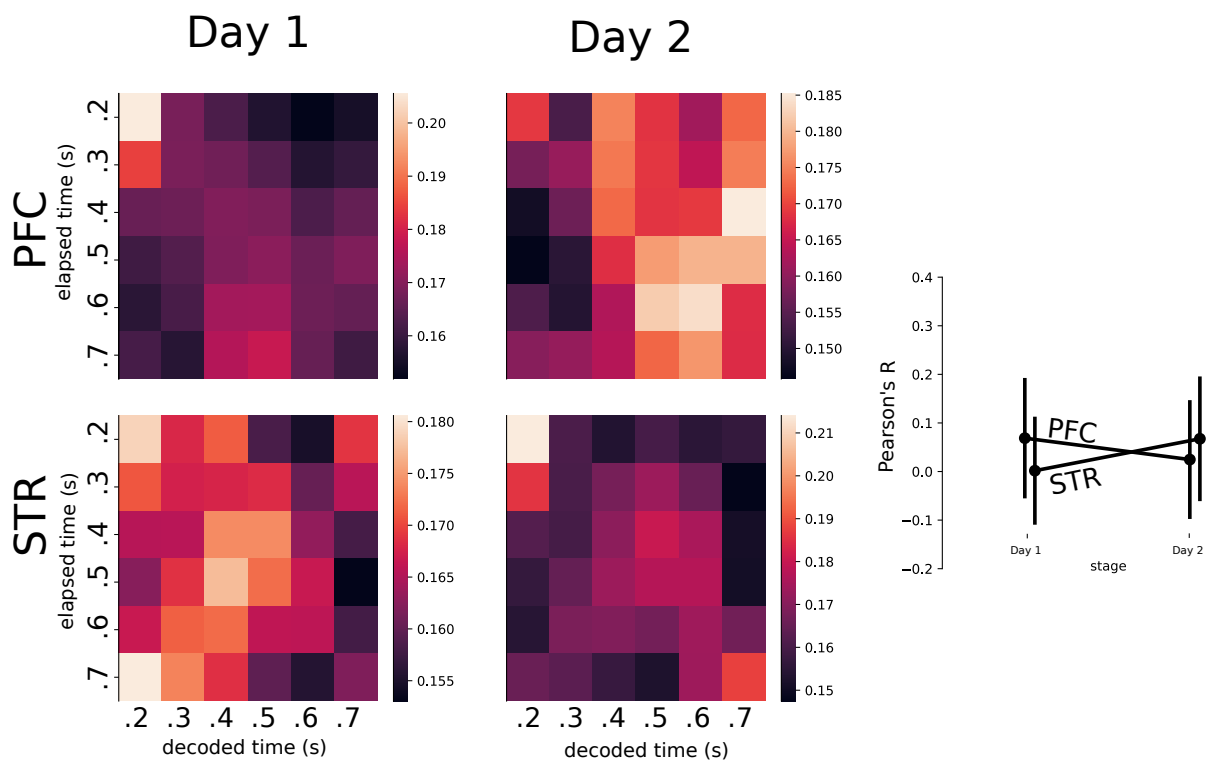

Supplement: supp1 [file elife-65495-supp1-v1.zip]
